# Supplementary material for: Effects of intraoperative PEEP on postoperative pulmonary complications in high-risk patients undergoing laparoscopic abdominal surgery: study protocol for a randomised controlled trial
Source: PubMed Central journal article supplement — BMJ Open. 2019 Oct 30;9(10):e028464. doi: 10.1136/bmjopen-2018-028464 (PMC6830676; doi:10.1136/bmjopen-2018-028464), 2019-10-30
Supplement: bmjopen-2018-028464supp002.pdf [file bmjopen-2018-028464supp002.pdf]

**Additional file 2: case report forms (CRF)**

Effects of intraoperative Low-PEEP on postoperative pulmonary complications in high-risk patients undergoing laparoscopic surgery: study protocol for a randomized controlled trial

## Case report form

### Checklist

Please check the checklist carefully when completed the questionnaire.

- Perioperative assessment: Informed patient details of the study and obtained informed consent from the patient.

Date of signing informed consent: \_\_\_\_\_

Admission date: \_\_\_\_\_

- Perioperative data      Surgery date: \_\_\_\_\_

- Completed the above registrations

Completed date: \_\_\_\_\_

Quality control personnel: \_\_\_\_\_

---

## Case registration form

### Basic information

Case number:

Patient case number:

Random number:

Randomized group:  Low-PEEP group (Study Group)  
 Standard PEEP group (Control Group)

Gender      male/female

Height      \_\_\_\_\_ cm

Ideal weight \_\_\_\_\_ kg

Actual weight \_\_\_\_\_ kg

Calculation formula of ideal weight:

male=  $50 + 0.91 \times (\text{Height} - 152.4)$ ;

female=  $45.5 \pm 0.91 \times (\text{Height} - 152.4)$

Age (years) \_\_\_\_\_

Contact staff \_\_\_\_\_

Phone number \_\_\_\_\_

Address \_\_\_\_\_

Chief surgeon \_\_\_\_\_

## Baseline Characteristics of the Patients

### 1. Inclusion and exclusion criteria (Please ✓ if there is any situation as listed below)

| Item                                                                                                             | Inclusion criteria |    |
|------------------------------------------------------------------------------------------------------------------|--------------------|----|
|                                                                                                                  | yes                | no |
| Age: ≥ 18 year                                                                                                   |                    |    |
| Scheduled for elective laparoscopic abdominal surgery                                                            |                    |    |
| ASA physical status I-III                                                                                        |                    |    |
| BMI: 18-35 kg/m <sup>2</sup>                                                                                     |                    |    |
| General anesthesia expected to last more than 3 h                                                                |                    |    |
| Had a intermediate or high preoperative index for PPCs risk (ARISCAT score ≥ 26, Supplementary Appendix Table 1) |                    |    |
|                                                                                                                  | Exclusion criteria |    |
| Emergency surgery                                                                                                |                    |    |
| Mechanical ventilation of > 1 hour within the last 2 weeks before surgery                                        |                    |    |
| History of previous severe (COPD)                                                                                |                    |    |
| Acute respiratory failure (pneumonia, acute lung injury or acute respiratory distress syndrome)                  |                    |    |
| Previous lung surgery                                                                                            |                    |    |
| Persistent hemodynamic instability or Severe cardiac disease                                                     |                    |    |
| Sepsis or septic shock                                                                                           |                    |    |
| Need renal replacement therapy                                                                                   |                    |    |
| Progressive neuromuscular illness                                                                                |                    |    |
| Pregnancy                                                                                                        |                    |    |
| Consented for another interventional study or refusal to participate                                             |                    |    |
| Have a stake in the researcher                                                                                   |                    |    |
| Researchers consider that they are not suitable for clinical trials                                              |                    |    |

### 2. Perioperative data (Please ✓ or Write down specific situation or if there is any situation as listed below and

please / If there is no corresponding situation)

| Preoperative                             |  | One hour after pneumothorax establishment |  | at the end of pneumothorax |  |
|------------------------------------------|--|-------------------------------------------|--|----------------------------|--|
| Temperature                              |  | arterial blood gas analysis               |  |                            |  |
| ASA status                               |  | FiO <sub>2</sub>                          |  |                            |  |
| ARISCAT score                            |  | Pneumoperal pressure                      |  |                            |  |
| NYHA III-IV                              |  | Tidal volume                              |  |                            |  |
| History of smoking                       |  | Respiratory rate                          |  |                            |  |
| Drinking                                 |  | PT-CO <sub>2</sub>                        |  |                            |  |
| Combined diseases                        |  | PEEP                                      |  |                            |  |
| History of Medication                    |  | Platform / peak pressure                  |  |                            |  |
| Respiratory infection within one month   |  | Blood pressure                            |  |                            |  |
| Weight change in the past one month      |  | Heart rate                                |  |                            |  |
| Blood routine examination                |  | Temperature                               |  |                            |  |
| Coagulation spectrum                     |  |                                           |  |                            |  |
| Biochemical tests                        |  | Intra-operative                           |  |                            |  |
| Chest X-ray or CT                        |  | Times of RM                               |  |                            |  |
| Pulmonary function test                  |  | Adverse events during RM                  |  |                            |  |
| mCPIS score                              |  | Antibiotic                                |  |                            |  |
|                                          |  | Infusion volume                           |  |                            |  |
|                                          |  | Blood transfusion                         |  |                            |  |
| Before anesthesia                        |  | Amount of bleeding                        |  |                            |  |
| SpO <sub>2</sub> without inhaling oxygen |  | Urine volume                              |  |                            |  |
| Arterial blood gas analysis              |  | Vasoactive drug use                       |  |                            |  |
|                                          |  | Operation time                            |  |                            |  |
|                                          |  | Mechanical ventilation time               |  |                            |  |
|                                          |  | Other complications                       |  |                            |  |

The amount of each day and duration for smoking and drinking; describe the specific disease and current medication and doses for columns of combined disease and medication history; only check if there is laboratory test or chest X-ray. etal; arterial blood gas analysis should performed after 10 min of air adaptation before anesthesia;

Intraoperative complications were recorded and defined as follows: 1. peripheral oxygen saturation less than 90% and/or end-tidal fractions of carbon dioxide more than 45 mmHg for more than 1 min, 2. need to change the ventilation setting (tidal volume and/or respiratory rate), 3. heart rate more than 100 beats/min or less than 60 beats/min, 4. systolic arterial pressure more than 150 mmHg or less than 90 mmHg.

Blood gas analysis during postoperative recovery room should done meet the following 2 points at the same time: 1. 30 minutes after the tracheal tube is removed; 2. after 10 min of air adaptation. If peripheral oxygen saturation dropped below 88% during the 10 min of adaptation, the maneuver was stopped and arterial blood gas analysis immediately obtained.

3. Postoperative pulmonary complications within 30 days after surgery (Please √ or Write down specific situation or if there is any situation as listed below and please / If there is no corresponding situation)

| Items/times                                                                         | POD 1 | POD 3 | POD 5 | POD 7 | POD 8-30 |
|-------------------------------------------------------------------------------------|-------|-------|-------|-------|----------|
| SpO <sub>2</sub> after 10 min of air adaptation                                     |       |       |       |       | /        |
| FiO <sub>2</sub> after 10 min of air adaptation                                     |       |       |       |       | /        |
| Arterial blood gas analysis                                                         |       |       | /     | /     | /        |
| Heart rate                                                                          |       |       |       |       |          |
| Respiratory rate                                                                    |       |       |       |       |          |
| Chest X-ray                                                                         | /     | /     |       | /     |          |
| Blood routine test                                                                  |       |       |       |       |          |
| CRP                                                                                 |       |       |       |       |          |
| Biochemical tests                                                                   |       |       |       |       |          |
| Microbiology test                                                                   |       |       |       |       |          |
| Mechanical Ventilation                                                              |       |       |       |       |          |
| Whether tracheal secretions was increased;<br>the nature and quantity of secretions |       |       |       |       |          |
| Cough                                                                               |       |       |       |       |          |
| Difficulty breathing                                                                |       |       |       |       |          |
| Chest pain                                                                          |       |       |       |       |          |
| Postoperative hypoxemia                                                             |       |       |       |       |          |
| Postoperative severe hypoxemia                                                      |       |       |       |       |          |
| Suspected lung infection                                                            |       |       |       |       |          |
| Pneumonia                                                                           |       |       |       |       |          |
| Exudation of the lungs                                                              |       |       |       |       |          |
| Aspiration pneumonia                                                                |       |       |       |       |          |
| Pulmonary embolism                                                                  |       |       |       |       |          |
| Atelectasis                                                                         |       |       |       |       |          |
| ARDS                                                                                |       |       |       |       |          |
| Pneumothorax                                                                        |       |       |       |       |          |
| Pleural effusion                                                                    |       |       |       |       |          |

ARDS: acute respiratory distress syndrome.

3. Postoperative extra-pulmonary complications within 30 days after surgery (Please ✓ or Write down specific situation or if there is any situation as listed below and please / If there is no corresponding situation)

| Items/times                             | POD 1 | POD 3 | POD 5 | POD 7 | POD 8-30 |
|-----------------------------------------|-------|-------|-------|-------|----------|
| SIRS                                    |       |       |       |       |          |
| Sepsis                                  |       |       |       |       |          |
| Severe sepsis                           |       |       |       |       |          |
| Sepsis shock                            |       |       |       |       |          |
| Extrapulmonary infection                |       |       |       |       |          |
| Pulmonary edema caused by heart failure |       |       |       |       |          |
| Blood transfusion                       |       |       |       |       |          |
| Anastomotic leak                        |       |       |       |       |          |
| Secondary surgery rate                  |       |       |       |       |          |

SIRS: Systemic inflammatory response syndrome; AKI: acute kidney injury; DIC: disseminated intravascular coagulation.
