# Supplementary material for: Effects of intraoperative PEEP on postoperative pulmonary complications in high-risk patients undergoing laparoscopic abdominal surgery: study protocol for a randomised controlled trial
Source: PubMed Central journal article supplement — BMJ Open. 2019 Oct 30;9(10):e028464. doi: 10.1136/bmjopen-2018-028464 (PMC6830676; doi:10.1136/bmjopen-2018-028464), 2019-10-30
Supplement: bmjopen-2018-028464supp004.pdf [file bmjopen-2018-028464supp004.pdf]

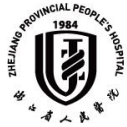

浙江省人民医院  
ZHEJIANG PROVINCIAL  
PEOPLE'S HOSPITAL

药物临床试验机构文件（机构办公室）

## Additional file 4. patient consent form in original language

### 浙江省人民医院临床科研知情同意书（版本一，2018年09月03日）

亲爱的患者：

医生已经确诊您为\_\_\_\_\_。我们将邀请您参加一项不同 PEEP 对高风险患者行腹腔镜腹部手术后肺部并发症的影响研究，本研究为\_\_\_\_\_项目，课题编号：\_\_\_\_\_。本研究方案已经得到\_\_\_\_\_浙江省人民医院\_\_\_\_\_伦理委员会审核，同意进行临床研究。

在您决定是否参加这项研究之前，请尽可能仔细阅读以下内容。它可以帮助您了解该项研究以及为何要进行这项研究，研究的程序和期限，参加研究后可能给您带来的益处、风险和不适。如果您愿意，您也可以和您的亲属、朋友一起讨论，或者请医生给予解释，帮助您做出决定。

#### 一、研究项目简介：

全世界每年有 2.3 亿以上的手术患者需要全身麻醉和机械通气，腹腔镜手术以其失血量少、术后疼痛轻和恢复快等优点得到广泛应用。接受普通外科手术的患者中约有 5% 会发生肺部并发症(post-operative pulmonary complications, PPC)，并且发生 PPC 的患者中约 20% 在术后 30 天内死亡。据报道，接受腹部手术的患者术后肺并发症(PPC)发生率在 12% 至 58% 之间。肺部并发症(post-operative pulmonary complications, PPC)是手术后住院时间延长和死亡主要原因之一。

相比高潮气量结合无 PEEP 的通气模式，近来越来越多的研究显示 LPV 在健康肺部患者全身麻醉下行腹部手术具有肺保护作用，降低 PPC 发生率。目前研究均建议对这部分患者采用低潮气量，但目前研究尚未明确合适的 PEEP 值。PEEP 过高可能引起肺泡过度膨胀、肺血管阻力增高和循环抑制，PEEP 过低又不能起到防止肺不张改善氧合的作用，均可造成不良后果<sup>[10]</sup>。因此制定最佳的 PEEP 显得尤为重要。

还有一点需要注意的是，以上这些研究手术类型为开腹手术或各种腹部手术类型，有研究认为腹腔镜手术(LAG)有利术后呼吸功能恢复，因为它需要相对较小的皮肤切口，但也需要同时考虑气腹对气道压和肺功能的影响。

综上所述，目前研究证实肺保护性通气策略可以改善腹部手术后肺部并发症，但尚未确定合适的 PEEP 值。鉴于以上原因，目前不同 PEEP 对高风险患者行腹腔镜腹部手术后肺部并发症的影响还未得到证实，有待进一步研究。

研究目的：

- 1 明确不同 PEEP 值对高风险患者行腹腔镜腹部手术后肺部并发症的影响，评价不同 PEEP

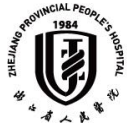

值与术后肺部并发症的关系。

2 明确不同 PEEP 值对高风险患者行腹腔镜腹部手术后其它指标的影响：（1）改良的临床肺部感染评分（mCPIS），术后肺外并发症，胸部 X 线表现变化和氧合作用；（2）术中并发症包括低氧血症，大量输血；（3）术后手术并发症，重症监护病房（ICU）住院时间，住院时间和 30 天死亡率。

## 二、参与试验的内容和过程：

- 1) 按照临床常规要求，配合医护人员完成相关的术前准备；
- 2) 如实提供自身疾病和相关检查治疗情况，以利于研究人员准确地进行研究相关的评估；
- 3) 如果您符合研究纳入标准，您可自愿参加研究，并签署知情同意书，您可能会被随机分配到标准 PEEP 值肺保护性通气策略模式组(对照组)或低 PEEP 值肺保护性通气策略模式组(处理组)，术中按照 2 种不同方案给予处理。
- 4) 因在研究过程中我们将观察记录您的血常规、血气分析情况，需要术后第 1 天、术后第 3 天和术后第 7 天这几个时间点进行血常规、血气分析检查，每次需要采血 3 ml 进行化验检查。

## 三、参加研究可能的受益

1. 个人受益：因术中机械通气参数的设置对腹部手术后肺部并发症、住院时间和死亡率有明显影响。手术过程中监测气道压和血气分析是临床上常用反应肺功能的指标，但是肺顺应性测量并未在临床中常规开展检测。故不论您在本次从研究中被分到哪一组，都可以采用全面的肺功能检测技术进行监测，临床医生根据检查结果进行相应处理，并可随时终止临床研究。参加本研究，患者肺功能障碍可能早期发现，围术期肺部并发症可能减少。在一定程度上可以促进您的恢复，提高您的舒适性。而且每次化验所需血样本 3 ml 并不会对的健康造成影响。

2. 社会受益：目前研究证实肺保护性通气策略可以改善腹部手术后肺部并发症，但尚未确定合适的 PEEP 值，而且也未明确肺保护性通气策略对腹腔镜下腹部手术患者的保护性。本研究立足于术中 PEEP 值对腹腔镜腹部手术后肺部并发症的影响，为预防腹腔镜下腹部手术患者术后肺部并发症的发生提供依据。

## 四、参加本项目的风险及处理措施：（可能出现的不良反应及其程度、应对的处理方案、补偿措施：治疗费用、赔付等）

很多研究实验都证实腹部手术中应用低潮气量联合 PEEP 能减少术后肺部并发症，目前我们临床上也是常规应用 PEEP 以预防肺部萎陷和肺部并发症。您有约 50%的机会被分到标



浙江省人民医院  
ZHEJIANG PROVINCIAL  
PEOPLE'S HOSPITAL

药物临床试验机构文件（机构办公室）

准 PEEP 组，可能存在潜在高气道压的风险，但我们在术中全程进行有效的气道压、肺顺应性和血气分析检查，全面分析肺功能，临床医生根据检查结果进行相应处理，并可随时终止临床研究。术中高气道压风险预防措施：①吸痰；②增加吸入麻醉药比；③减少潮气量为 6 ml/kg (PBW)；④逐步减少 PEEP 值至 0；⑤改为压力控制模式通气。任何研究调查者任何时间发现怀疑有不良事件或对继续实验有任何伦理问题会立即通知主持者（课题联络员：周振锋；13685856148；负责人：胡双飞；13777858909）。

## 五、有关费用：

本课题组负责血气检测费用，较临床常规未增加其它药物费用。受试者和医疗保险部门或第三方支付者将不会为研究相关医疗付费。研究机构支付研究相关支持（包括中心实验室）。受试者和医疗保险部门或第三方支付者需要为常规医疗或与研究无关的医疗进行付费。这些常规医疗包括住院医疗和出院时带药或其它医疗。

本研究较临床常规未增加药物费用和增加临床治疗风险，自愿参加研究，无相关经济补偿。如因为本研究所造成受试者的相关信息泄露、侵害人生权益等事件，对受试者造成一定损害的，我们将与受试者协商后给予相关经济补偿。

## 六、您的权力：

您参与试验是完全自愿的，您可以随时退出试验而无需理由，绝不会影响您和医务人员的关系及今后的诊治；您的所有个人资料和观察记录均属保密，仅供本研究使用；试验期间，您可随时了解有关的信息资料，如在试验中发生问题或需要咨询有关问题时，可与主管医师联系。

## 七、伦理委员会

本研究已向浙江省人民医院人体研究伦理委员会报告，经委员会的全面审查和包括对受试者的风险评估，并获得了批准。在研究中过程中，有关伦理和权益事宜可联系浙江省人民医院人体研究伦理委员会，电话：白天 08:00-17:00，0571-85893643；晚上（总值班）：15967110068；邮箱地址：[zryllwyh@163.com](mailto:zryllwyh@163.com)



浙江省人民医院  
ZHEJIANG PROVINCIAL  
PEOPLE'S HOSPITAL

药物临床试验机构文件（机构办公室）

## 知情同意书. 同意签字页

### 同意声明

作为一名患者，我在了解了本项试验的目的、方法、可能获得的治疗利益和可能发生的不良反应后，我将获得一份经过签名并注明日期的知情同意书副本。

愿意参加此项研究，并保证尽量遵从医嘱。

患者签名：\_\_\_\_\_ 年 \_\_ 月 \_\_ 日

联系电话：\_\_\_\_\_

-----  
-----

我确认已向患者解释了本试验的详细情况，包括其权力以及可能的受益和风险，并给其一份签署过的知情同意书副本。

医生签名：\_\_\_\_\_ 年 \_\_ 月 \_\_ 日

医生的工作电话：\_\_\_\_\_
