# Supplementary material for: Effects of intraoperative PEEP on postoperative pulmonary complications in high-risk patients undergoing laparoscopic abdominal surgery: study protocol for a randomised controlled trial
Source: PubMed Central journal article supplement — BMJ Open. 2019 Oct 30;9(10):e028464. doi: 10.1136/bmjopen-2018-028464 (PMC6830676; doi:10.1136/bmjopen-2018-028464), 2019-10-30
Supplement: bmjopen-2018-028464supp005.pdf [file bmjopen-2018-028464supp005.pdf]

Additional file 5: preoperative risk index of postoperative pulmonary complications by ARISCAT score

| Preoperative risk factor                | Point Value |
|-----------------------------------------|-------------|
| Age (year)                              |             |
| ≤ 50                                    |             |
| 51–80                                   | 3           |
| > 80                                    | 16          |
| 50-59                                   | 4           |
| Preoperative SpO <sub>2</sub> (%)       |             |
| ≥ 96                                    |             |
| 91–95                                   | 8           |
| ≤ 90                                    | 24          |
| Respiratory infection in the last month | 17          |
| Preoperative anemia (≤ 100 g/L)         | 11          |
| Surgical incision                       |             |
| Peripheral                              |             |
| Upper abdominal                         | 15          |
| Intrathoracic                           | 24          |
| Duration of surgery (h)                 |             |
| ≤ 2                                     |             |
| 2 - 3                                   | 16          |
| > 3                                     | 23          |
| Emergency procedure                     | 8           |

Intermediate Risk= 26–44 Points; High Risk= ≥45 Points; SpO<sub>2</sub>= oxyhemoglobin saturation by pulse oximetry breathing air in supine position.
