# Supplementary material for: Effects of intraoperative PEEP on postoperative pulmonary complications in high-risk patients undergoing laparoscopic abdominal surgery: study protocol for a randomised controlled trial
Source: PubMed Central journal article supplement — BMJ Open. 2019 Oct 30;9(10):e028464. doi: 10.1136/bmjopen-2018-028464 (PMC6830676; doi:10.1136/bmjopen-2018-028464), 2019-10-30
Supplement: bmjopen-2018-028464supp006.pdf [file bmjopen-2018-028464supp006.pdf]

Additional file 6. Strategy for SpO<sub>2</sub> decreasing

| step                                                | 1   | 2   | 3   | 4   | 5   | 6   | 7   | 8   | 9  |
|-----------------------------------------------------|-----|-----|-----|-----|-----|-----|-----|-----|----|
| FiO <sub>2</sub>                                    | 0.5 | 0.6 | 0.6 | 0.7 | 0.7 | 0.8 | 0.8 | 1.0 | RM |
| standard PEEP group<br>(cm H <sub>2</sub> O)        | 5   | 5   | 4   | 4   | 3   | 3   | 2   | 2   | 2  |
| low PEEP ventilation<br>group (cm H <sub>2</sub> O) | 3   | 3   | 4   | 4   | 5   | 5   | 6   | 6   | 6  |

FiO<sub>2</sub>= Fraction of inspired oxygen; PEEP= Positive end-expiratory pressure; RM= Recruitment maneuver
